# Supplementary material for: Effect of protic ionic liquids (PILs) on the formation of non-ionic dodecyl poly(ethylene oxide) surfactant self-assembly structures and the effect of these surfactants on the nanostructure of PILs
Source: Royal Society of Chemistry journal article supplement (doi:10.1039/c1cp21381d), 2011-01-01
Supplement: c1cp21381d.pdf [file c1cp21381d.pdf]

## Effect of Protic Ionic Liquids (PILs) on the Formation of Non-Ionic Dodecyl Poly(ethylene oxide) Surfactant Self-Assembly Structures and the Effect of these Surfactants on the Nanostructure of PILs.

Tamar L. Greaves<sup>a</sup>, Stephen T. Mudie<sup>b</sup> and Calum J. Drummond<sup>a</sup>

<sup>a</sup> CSIRO Materials Science and Engineering (CMSE), Bag 10, Clayton, VIC 3169, Australia. Email: Calum.Drummond@csiro.au

<sup>b</sup> SAXS/WAXS beam line, Australian Synchrotron, 800 Blackburn Rd, Clayton VIC 3169, Australia

### Supplementary Material

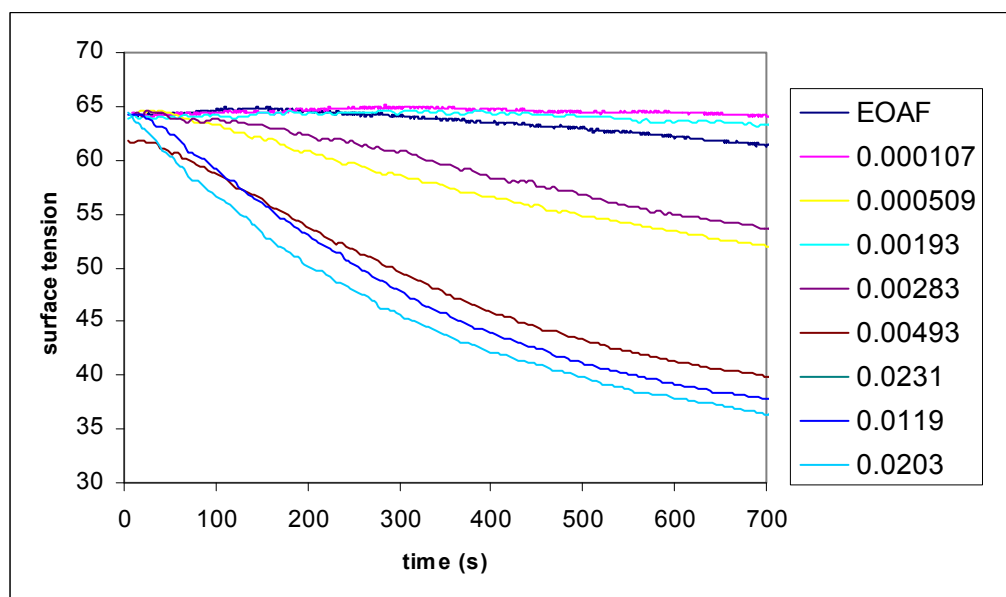

**Figure S1.** Surface tension of  $C_{12}E_6$ -EOAF hanging drops over time. Concentrations in wt%.

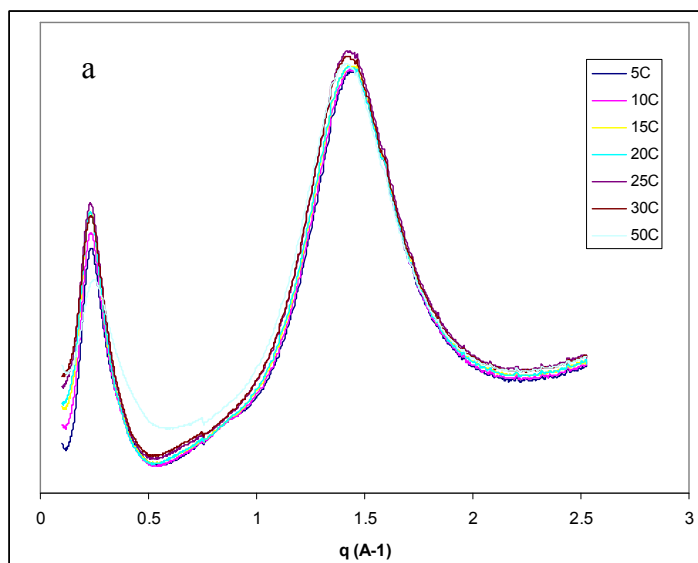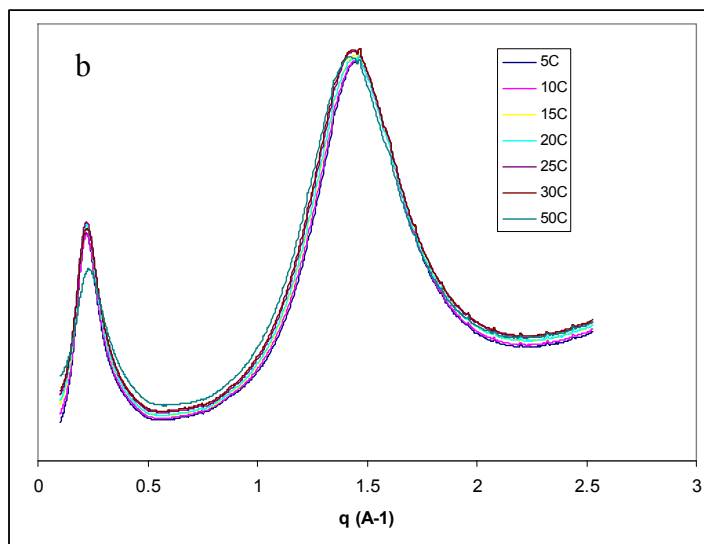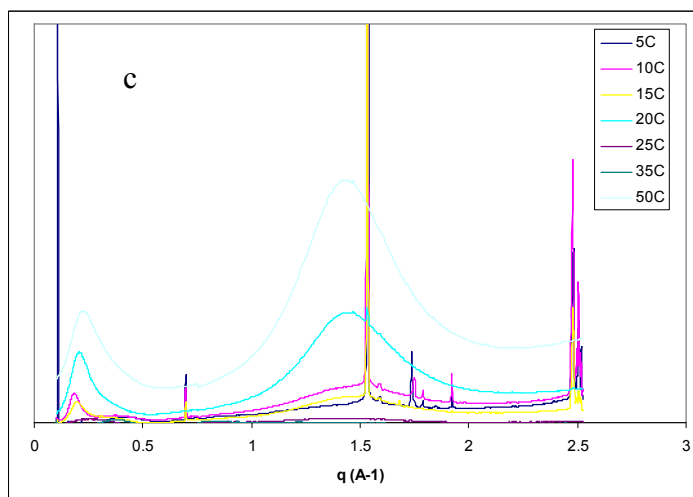

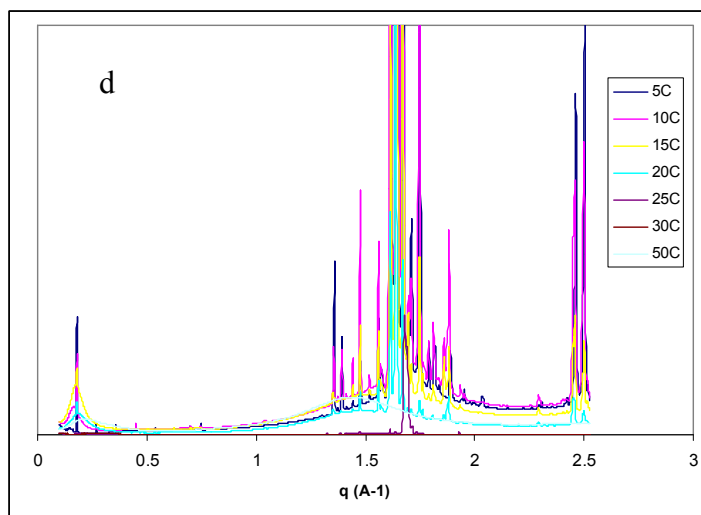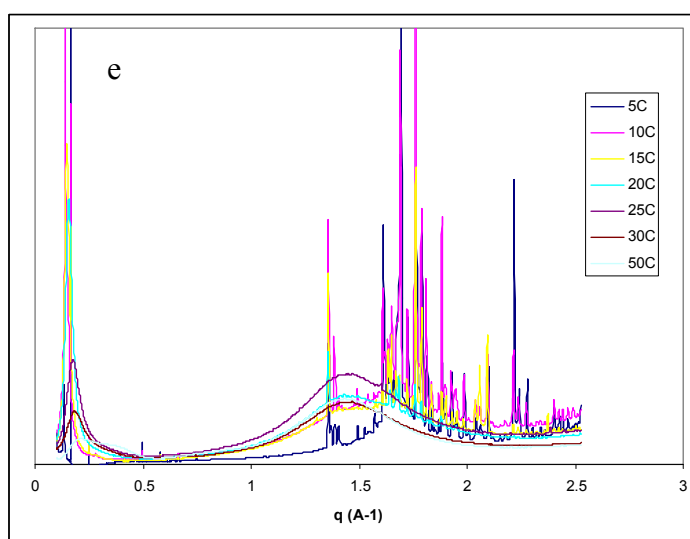

**Figure S2.** Combined SAXS and WAXS patterns for a)  $C_{12}E_3$ , b)  $C_{12}E_4$ , c)  $C_{12}E_5$ , d)  $C_{12}E_7$  and e)  $C_{12}E_8$ .

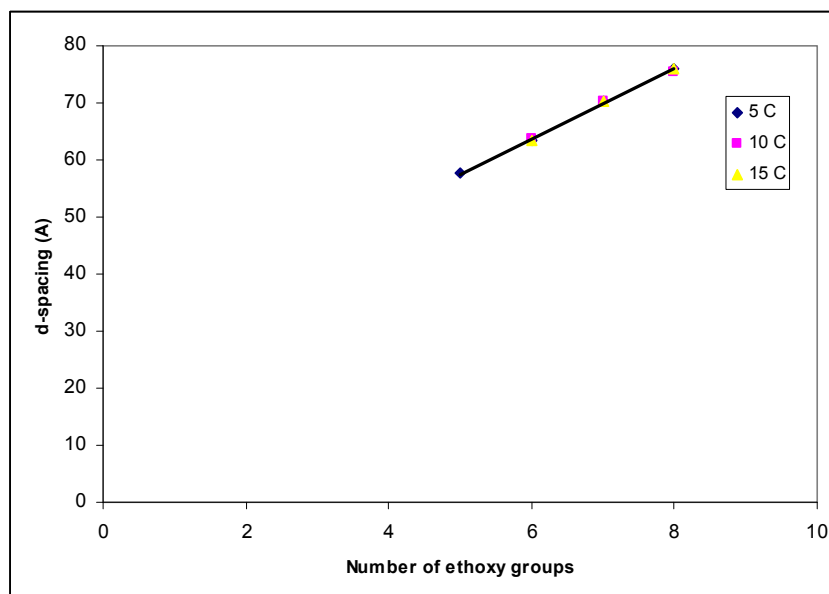

**Figure S3.** Relationship between the d-spacing of the crystalline  $C_{12}E_n$  surfactants and the number of ethoxy groups (n).

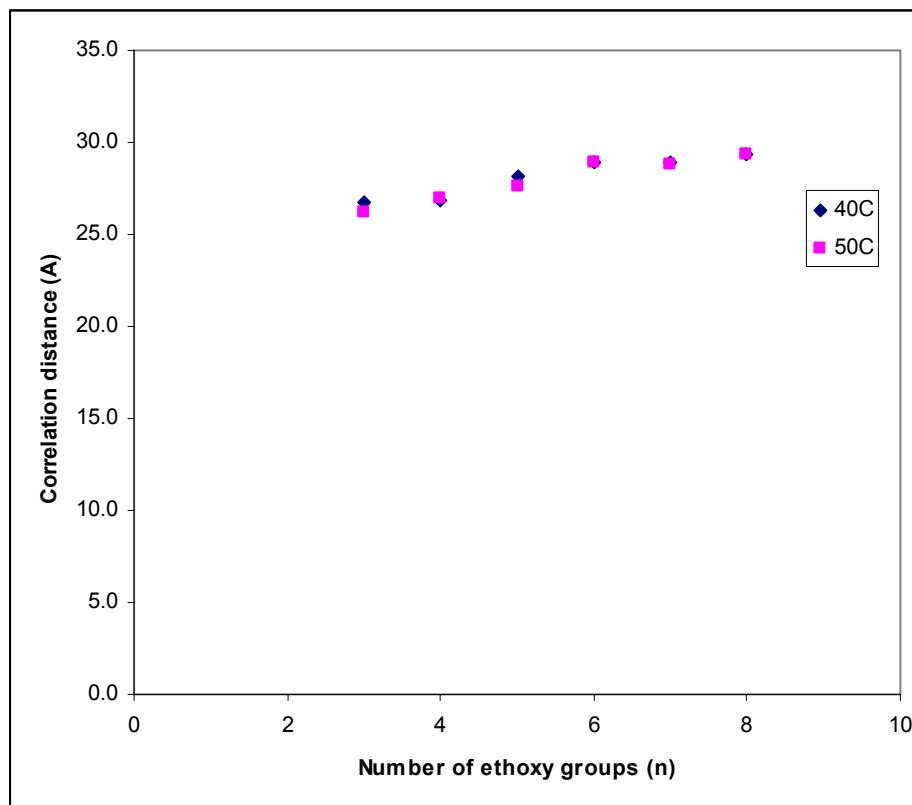

**Figure S4.** Relationship between the correlation distance of the liquid  $C_{12}E_n$  surfactants and the number of ethoxy groups (n) at 40 and 50 °C.

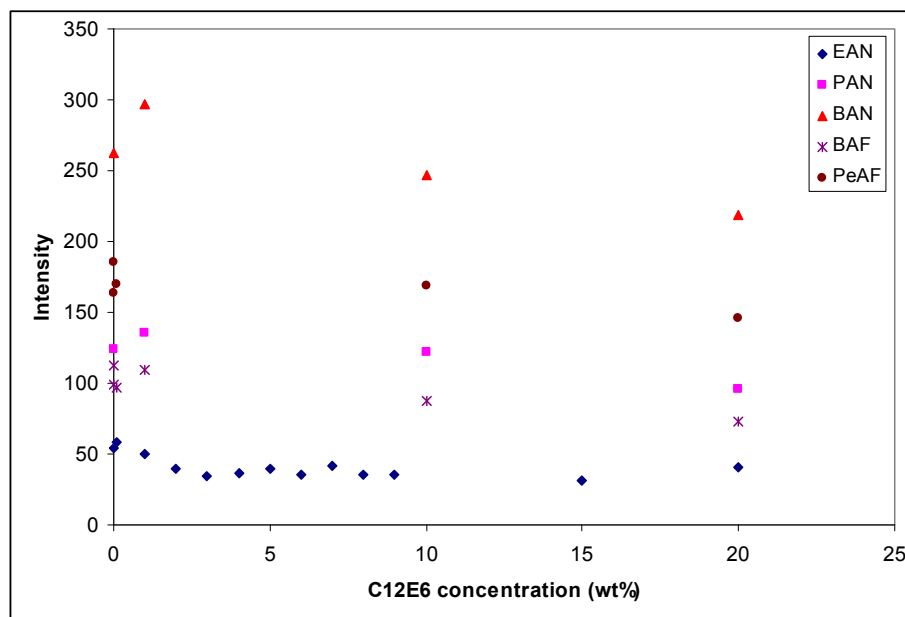

**Figure S5.** Change in intensity of peak 1 with increasing  $C_{12}E_6$  surfactant concentration.

**Table S1.** CMC and cloud points for C<sub>12</sub>E<sub>n</sub> surfactants in EAN and water.

---

|                                | <b>Cloud point in<br/>water (1 wt%)<br/>°C<sup>a</sup></b> | <b>Cloud point in<br/>EAN (1 or 5<br/>wt%) °C</b> |
|--------------------------------|------------------------------------------------------------|---------------------------------------------------|
| C <sub>12</sub> E <sub>3</sub> | < 0                                                        | >130                                              |
| C <sub>12</sub> E <sub>4</sub> | 5                                                          | >130                                              |
| C <sub>12</sub> E <sub>5</sub> | 31.7                                                       | >130                                              |
| C <sub>12</sub> E <sub>6</sub> | 52                                                         | >130                                              |
| C <sub>12</sub> E <sub>7</sub> | 63.4                                                       | >130                                              |
| C <sub>12</sub> E <sub>8</sub> | 78                                                         | >130                                              |

<sup>a</sup> References within <sup>52</sup>.

---
